# Supplementary material
Source: PubMed Central journal article supplement (PMC3796882)
Supplement: 97320630009813S1.pdf [file 97320630009813S1.pdf]

## Supplementary material:

**Table 1:** List of energy for BglB-CBI, BglB-CTT and BglB-CTR complexes obtained from docking experimental

|                                              | <i>BglB-CBI</i> | <i>BglB-CTT</i> | <i>BglB-CTR</i> |
|----------------------------------------------|-----------------|-----------------|-----------------|
| Binding Energy, $\Delta G_b$ (kcal/mol)      | -6.2            | -5.68           | -5.63           |
| Ligand Efficiency                            | -0.27           | -0.13           | -0.17           |
| Inhibition Constant, $K_i$ ( $\mu\text{m}$ ) | 28.39           | 68.76           | 74.94           |
| Intermol. Energy(kJ/mol)                     | -9.78           | -12.84          | -10.4           |
| VDW Desolvation (kcal/mol)                   | -9.42           | -11.48          | -9.39           |
| Electrostatical energy(kcal/mol)             | -0.36           | -1.35           | -1.07           |
| Total Internal(kJ/mol)                       | -3.83           | -9.09           | -5.66           |
| Torsional Energy(kJ/mol)                     | 3.58            | 7.16            | 4.77            |
| Unbound Energy(kJ/mol)                       | -3.83           | -9.09           | -5.66           |
| Hydrogen Bond Formed                         | 10              | 7               | 7               |

**Table 2:** List of hydrogen bond length for BglB-CBI, BglB-CTT and BglB-CTR complexes

| <i>Enzyme-Substrates Complex</i> | <i>H-Bonds No.</i> | <i>Ligand Atom</i> | <i>Receptor Atom</i> | <i>Length (Å)</i> |
|----------------------------------|--------------------|--------------------|----------------------|-------------------|
| BglB-CBI                         | 1                  | O5                 | GLU356 OE1           | 2.85              |
|                                  | 2                  | O5                 | ASN166 OD1           | 2.88              |
|                                  | 3                  | O6                 | GLU167 OE1           | 2.97              |
|                                  | 4                  | O6                 | GLU167 OE2           | 2.81              |
|                                  | 5                  | O4                 | GLN22 OE1            | 2.81              |
|                                  | 6                  | O3                 | GLN22 NE2            | 2.91              |
|                                  | 7                  | O10                | GLU409 O             | 3.09              |
|                                  | 8                  | O11                | GLU409 OE2           | 2.68              |
|                                  | 9                  | O10                | HIS181 N             | 3.15              |
|                                  | 10                 | O3                 | GLU409 OE2           | 2.85              |
| BglB-CTT                         | 1                  | O6                 | GLN22 NE2            | 3.08              |
|                                  | 2                  | O6                 | TRP402 NE1           | 3.16              |
|                                  | 3                  | O7                 | GLU409 OE2           | 2.68              |
|                                  | 4                  | O9                 | HIS181 NE2           | 2.84              |
|                                  | 5                  | O1                 | HIS181 NE2           | 3.3               |
|                                  | 6                  | O14                | GLU180 OE2           | 2.62              |
|                                  | 7                  | O15                | GLU180 OE1           | 3.05              |
| BglB-CTR                         | 1                  | O6                 | GLN22 NE2            | 3.08              |
|                                  | 2                  | O6                 | TRP402 NE1           | 3.16              |
|                                  | 3                  | O9                 | HIS181 NE2           | 2.84              |
|                                  | 4                  | O7                 | GLU409 OE2           | 2.68              |
|                                  | 5                  | O14                | GLU180 OE2           | 2.62              |
|                                  | 6                  | O1                 | HIS181 NE2           | 3.3               |
|                                  | 7                  | O15                | GLU180 OE1           | 3.05              |
